1           **New Insights into the Genetic Diversity of the Bacterial Plant**  
2           **Pathogen ‘*Candidatus Liberibacter solanacearum*’ as Revealed by**  
3           **a New Multilocus Sequence Analysis Scheme**  
4

5  
6           Ahmed Hajri, Pascaline Cousseau-Suhard, Pascal Gentit and Marianne Loiseau\*

7  
8           Plant Health Laboratory, ANSES, Angers, France.  
9

10          **Abstract**

11          ‘*Candidatus Liberibacter solanacearum*’ (Lso) has emerged as a serious threat on solanaceous  
12          and apiaceous crops worldwide. Five Lso haplotypes (LsoA, LsoB, LsoC, LsoD and LsoE)  
13          have been identified so far. To decipher genetic relationships between Lso strains, a MLSA  
14          study of seven housekeeping genes (*acnA*, *atpD*, *ftsZ*, *glnA*, *glyA*, *gnd* and *groEL*) was  
15          performed on a representative bacterial collection of 49 Lso strains. In all, 5415 bp spanning  
16          the seven loci were obtained from each of the 49 strains of our bacterial collection. Analysis of  
17          sequence data was consistent with a clonal population structure with no evidence of  
18          recombination. Phylogenies reconstructed from individual genes, and with concatenated data,  
19          were globally congruent with each other. In addition to the five highly supported and distinct  
20          genetic clusters, which correspond to the five established haplotypes, our phylogenetic data  
21          revealed the presence of a sixth haplotype, designated ‘LsoG’. This new haplotype is currently  
22          represented by two strains from France which had distinct sequences in four out of the seven  
23          tested housekeeping genes. Altogether, the data presented here provide new information  
24          regarding the genetic structure of Lso and the evolutionary history of the haplotypes defined  
25          within this bacterial species.  
26

27          **Running title:** ‘*Candidatus Liberibacter solanacearum*’ genetic diversity  
28

29          **Keywords:** ‘*Candidatus Liberibacter solanacearum*’, genetic diversity, haplotype, MLSA,  
30          apiaceous and solanaceous crop  
31

32          \*Correspondence: Marianne Loiseau, marianne.loiseau@anses.fr  
33  
34  
35

## 36 Introduction

37 ‘*Candidatus Liberibacter solanacearum*’ (Lso) is an unculturable phloem-limited bacterium that  
38 spreads from infected to healthy plants by psyllid vectors. This phytopathogenic bacterium  
39 includes strains responsible for diseases of several solanaceous and apiaceous crops  
40 (Haapalainen, 2014). Within this bacterial species, strains were classified into five haplotypes  
41 (LsoA, LsoB, LsoC, LsoD and LsoE). These haplotypes were defined based on genotyping of  
42 the 16S rRNA, 16S/23S ISR and 50S *rpIJ-rpIL* ribosomal gene loci, where any co-inherited  
43 single-nucleotide polymorphism (SNP) variant led to the classification in a new haplotype  
44 (Nelson et al., 2011, 2013; Teresani et al., 2014). LsoA and LsoB are associated with diseases  
45 of solanaceous crops, especially Zebra chip (ZC) disease of potato (*Solanum tuberosum*) in  
46 North America and New Zealand (Hansen et al., 2008; Liefting et al., 2008a; Lin et al., 2009),  
47 and are vectored to solanaceous plants by the potato/tomato psyllid, *Bactericera cockerelli*  
48 (Hemiptera: Triozidae) (Munyanza et al., 2007; Secor et al., 2009). In addition to ZC disease,  
49 LsoA and LsoB cause diseases on other economically important solanaceous hosts, including  
50 tomato (*Solanum lycopersicum*), pepper (*Capsicum annuum*), eggplant (*Solanum melongena*),  
51 tomatillo (*Solanum betaceum*), tobacco (*Nicotiana tabacum*) and Cape gooseberry (*Physalis*  
52 *peruviana*) (Liefting et al., 2008b; Ling et al., 2011; Munyanza et al., 2016). LsoC is vectored  
53 by the carrot psyllid *Trioza apicalis*, and is associated with carrot in northern Europe  
54 (Munyanza et al., 2010a,b; 2012a,b; 2015; Nissinen et al., 2014). LsoD and LsoE are  
55 associated with the carrot psyllid *Bactericera trigonica*, and with vegetative disorders on  
56 several apiaceous crops in southwestern Europe and the Mediterranean area (Alfaro-Fernández  
57 et al., 2012a,b; Nelson et al., 2013; Loiseau et al., 2014; Tahzima et al., 2014, 2017; Teresani  
58 et al., 2014; Hajri et al., 2017; Mawassi et al., 2018). A better understanding of the relationships  
59 between Lso strains isolated from a set of various host plants in different geographical locations  
60 may help to better explain the increasing spread and extended host range of Lso.

61  
62 Up to now, there has been no known biological mechanism explaining the different host range  
63 of the five haplotypes within Lso. The diversification of this species into different lineages  
64 could result from ecological adaptation, geographical structure or neutral processes  
65 (Haapalainen, 2014; Munyanza, 2015). Genetic diversity investigations may provide an  
66 understanding of the population structure of a bacterial species and the evolutionary forces that  
67 led to its diversification (Puttamuk et al., 2014). For Lso, few studies have been attempted to  
68 investigate its population structure and genetic diversity, in particular due to its fastidious nature  
69 (Lin and Gudmestad, 2013). Sequencing of the 16S rRNA, 16S/23S ISR and 50S *rpIJ-rpIL*  
70 ribosomal gene loci has become the method of choice for the study of the genetic diversity of  
71 the bacterium (Lin et al., 2009; Wen et al., 2009; Nelson et al., 2011, 2013; Teresani et al.,  
72 2014; Alfaro-Fernández et al., 2017; Haapalainen et al., 2017; Hajri et al., 2017; Monger and  
73 Jeffries, 2018). However, genetic variation within these genes does not generally allow  
74 differentiation of closely related strains due to their high degree of conservation (Lin and  
75 Gudmestad, 2013). In addition to ribosomal genes, simple repeat sequences (SSR) and  
76 multilocus sequence typing (MLST) markers have been used to assess the genetic diversity of  
77 the bacterium (Lin et al., 2012; Glynn et al., 2012). However, these studies focused only on Lso  
78 solanaceous haplotypes (LsoA and LsoB), which is not sufficient to understand the extent of  
79 the genetic diversity of this bacterial species (Lin and Gudmestad, 2013; Haapalainen, 2014).  
80 More recently, genetic variation of LsoC was investigated by MLST (Haapalainen et al., 2018).  
81 To our knowledge, there is no information regarding the phylogenetic relationships between a  
82 large set of strains representing the five Lso haplotypes using multiple loci.

83

84 Multilocus sequence analysis (MLSA) has become the standard for phylogenetic analyses of  
85 bacterial species and has been shown to be a powerful molecular method for microbial  
86 population genetic studies. This method consists of the analysis of multiple (usually four to  
87 eight) conserved housekeeping genes, which encode proteins that are essential for the survival  
88 of the organism (Cooper and Feil, 2004; Gevers et al., 2005; Almeida et al., 2010). MLSA relies  
89 on the concatenation of aligned DNA sequences from each gene. Mutations within  
90 housekeeping genes are largely assumed to be selectively neutral, and therefore are more likely  
91 to correctly reflect the phylogeny of the strains (Gevers et al., 2005; Hajri et al., 2012). In  
92 addition, the concatenated sequence data could reduce the weight of horizontal gene transfer  
93 ‘HGT’ (Macheras et al., 2011) and/or recombination (Timilsina et al., 2015), which may  
94 provide more reliable phylogenetic relationships among closely related strains (Glaeser and  
95 Kämpfer, 2015). MLSA has been successfully used to describe the genetic structure of several  
96 phytopathogenic bacteria (Castillo and Greenberg, 2007; Young et al., 2008; Almeida et al.,  
97 2010; Trantas et al., 2013 ; Tancos et al., 2015; Constantin et al., 2016). Despite the availability  
98 of several *Lso* genomic sequences (Lin et al., 2011; Thompson et al., 2015; Wu et al., 2015;  
99 Wang et al., 2017), this strategy has never been applied to *Lso*.

100

101 In this paper, we studied the genetic structure of *Lso* and the phylogenetic relationships of  
102 strains belonging to different haplotypes that have so far been defined in this species. For this  
103 purpose, we designed a new MLSA scheme based on partial sequencing of seven housekeeping  
104 genes (*acnA*, *atpD*, *ftsZ*, *glnA*, *glyA*, *gnd* and *groEL*). Using a representative bacterial collection  
105 of 49 *Lso* strains, we evaluated its robustness with respect to defining the genetic structure of  
106 the bacterium.

107

108

## 109 **Materials and methods**

110

### 111 **Bacterial strains**

112 The 49 *Lso* strains used in this study are listed in Table 1. Strains were selected in order to  
113 maximize the diversity in terms of geographical origin, host and year of isolation. Forty-two  
114 strains have been isolated from several solanaceous and apiaceous crops and from different  
115 psyllids (*B. cockerelli*, *B. trigonica* and *T. apicalis*). In addition, we included for comparative  
116 purposes, the six published *Lso* genomes: strain ZC1 (Lin et al., 2011), strain RSTM (Wu et  
117 al., 2015), strain NZ1 and strain HenneA (Thompson et al., 2015), and strains FIN111 and  
118 FIN114 (Wang et al., 2017). We also included in our phylogenetic analysis the recently  
119 deposited draft genome sequence of *LsoD* (GenBank accession number  
120 NZ\_PKRU00000000.1).

121

### 122 **DNA extraction**

123 In this study, genomic DNAs of the 42 strains were extracted using (i) a slightly modified  
124 cetyltrimethylammonium bromide (CTAB) buffer extraction method (Murray and Thompson,  
125 1980); and (ii) the magnetic-bead-based QuickPick™ SML Plant DNA Kit (Bio-Nobile)  
126 according to the manufacturer’s instructions. Each extraction series contained positive and  
127 negative controls.

## 128 **Selection of housekeeping genes**

129 For the design of our MLSA scheme, several criteria were used in the selection of the potential  
130 genes. The genes included were (i) those encoding for putative housekeeping products with  
131 important biological functions (ii) evenly distributed across the genome as assessed from the  
132 Lso sequenced genomes, and (iii) present in one single copy in the Lso sequenced genomes.  
133 Using these criteria, we selected seven housekeeping genes: *acnA* (aconitate hydratase); *atpD*  
134 (ATP synthase subunit beta); *ftsZ* (cell division protein); *glnA* (glutamine synthetase I); *glyA*  
135 (serine hydroxymethyltransferase); *gnd* (6-phosphogluconate dehydrogenase) and *groEL*  
136 (molecular chaperone). Figure 1 shows the genomic location of the genes used in this study  
137 based on the Lso ZC1 genome.  
138

## 139 **Gene amplification and sequencing**

140 Primers for partial sequencing of the seven housekeeping genes were designed (Table 2) based  
141 on the alignments of orthologous sequences collected from the six Lso genomes available in  
142 GenBank: strain ZC1, strain NZ1, strain HenneA, strain RSTM, strain FIN111 and strain  
143 FIN114. PCR amplification of each gene was performed in a 25- $\mu$ L reaction mix using the Bio-  
144 X-Act short polymerase mix (Bioline, London, UK), 0.2  $\mu$ M of forward and reverse primers,  
145 and 2  $\mu$ L of DNA. The PCR conditions were an initial denaturation at 95°C for 5 min; followed  
146 by 35 cycles of 30 s of denaturation at 94°C, 30 s of annealing at 58°C, and 1 min of extension  
147 at 72°C and followed by 10 min of a final extension at 72°C. All PCR series included positive  
148 and negative controls. Amplified PCR products were separated on 1.5% agarose gels containing  
149 ethidium bromide for visualization. PCR products were directly sequenced with forward and  
150 reverse primers (Genewiz, Takeley, UK).  
151

## 152 **Sequence acquisition and alignment**

153 Forward and reverse nucleotide sequences were assembled using the CAP3 contig assembly  
154 program (Huang and Madan, 1999) to obtain high-quality sequences. Multiple alignments were  
155 edited using the ClustalW tool of the BIOEDIT program version 7.2.6.1 (Hall, 1999).  
156 Sequences were concatenated following the alphabetic order of the genes, ending in a sequence  
157 of 5415 bp (bp 1 to 816 for *acnA*, 817 to 1575 for *atpD*, 1576 to 2349 for *ftsZ*, 2350 to 3132 for  
158 *glnA*, 3133 to 3879 for *glyA*, 3880 to 4623 for *gnd*, and 4624 to 5415 for *groEL*).  
159

## 160 **Sequence data analysis**

161 Summary statistics for the sequences were computed using DnaSP version 5.10.01 (Librado  
162 and Rozas, 2009). The GC content, number of polymorphic sites (S), nucleotide diversities ( $\theta\pi$   
163 and  $\theta_w$ ) (Nei, 1987; Watterson, 1975), and neutrality test of Tajima's D (Tajima, 1989) were  
164 estimated for each of the seven genes and on concatenated sequences. DnaSP was also used to  
165 calculate the ratio of non-synonymous to synonymous substitutions (dN/dS) (Nei and Gojobori,  
166 1986) in order to test the degree of selection on a locus. Values of dN/dS of 1, dN/dS>1 and  
167 dN/dS <1 indicate neutrality, diversifying selection and purifying selection, respectively.  
168 Occurrence of recombination was analyzed on each gene using the different recombination  
169 detection methods as implemented in RDP v4 (Martin et al., 2015). The analysis was performed  
170 with default settings for the different detection methods and the Bonferroni-corrected P-value  
171 cut-off was set at 0.05.  
172

## 173 **Phylogenetic analyses**

174 Phylogenetic analyses were performed on individual gene sequences as well as on the dataset  
175 of concatenated sequences of the 49 strains of our bacterial collection. Strain psy62 of ‘*Ca. L.*  
176 *asiaticus*’ (Duan et al., 2009) was used to root trees. Maximum Likelihood trees were generated  
177 with the MEGA 7.0.14 software program (Kumar et al., 2016) using the Kimura two-parameter  
178 model (Kimura, 1980). Statistical support for tree nodes was evaluated by bootstrap analyses  
179 with 1000 replicates. To determine the haplotype affiliation of tested Lso strains, the sequenced  
180 genomes of strains from LsoA (strains NZ1, HenneA and RSTM), LsoB (strain ZC1), LsoC  
181 (strains FIN111 and FIN114) and LsoD (strain haplotype D1) were included in the analysis.  
182 For LsoE for which no published genome sequence is available, we used as reference, strain  
183 14/235 that was previously determined as belonging to LsoE using the 16S rRNA gene and the  
184 50S ribosomal protein *rplJ-rpIL* gene region (Hajri et al., 2017).  
185

## 186 **Sequence accession numbers**

187 Two hundred and ninety four sequences generated in this study were deposited in the GenBank  
188 database with accession numbers MH108648 - MH108689 for *acnA*, MH108690 - MH108731  
189 for *atpD*, MH108732 - MH108773 for *ftsZ*, MH108774 - MH108815 for *glnA*, MH108816 -  
190 MH108857 for *glyA*, MH108858 - MH108899 for *gnd* and MH108900 - MH108941 for *groEL*.  
191

192

193

## 193 **Results**

194

### 195 **Sequence analysis and DNA polymorphism**

196 In the present study, amplification was successful for all tested Lso strains with the seven  
197 housekeeping genes. To validate the choice of the seven loci as appropriate phylogenetic  
198 markers for Lso, descriptive statistics on nucleotide and allelic diversities were calculated for  
199 each locus and for the concatenated dataset. The 49 sequences of each locus were aligned; no  
200 gap and no insertion in the sequences of all tested Lso strains were detected. Analyzed sequence  
201 lengths ranged from 744 bp (*gnd*) to 816 bp (*acnA*), leading to a total of 5415 bp for the  
202 sequence of concatenated dataset (Table 3). The GC content for all loci ranged from 33.9%  
203 (*gnd*) to 43.2% (*ftsZ*). All loci were polymorphic and the number of polymorphic nucleotide  
204 sites varied from 12 for the least polymorphic locus (*ftsZ*) to 27 for the most polymorphic locus  
205 (*glnA*) (Table 3). The value for the neutrality test of Tajima was positive for 4 loci (*ftsZ*, *glnA*,  
206 *glyA* and *groEL*), negative for 3 loci (*acnA*, *atpD* and *gnd*) and positive for the concatenated  
207 data but it was not significant for all tested loci and for concatenated data. The dN/dS ratios of  
208 all tested housekeeping genes were <1, indicating that these loci were subject to purifying  
209 selection. No recombination event was detected with the RDP program, indicating that the Lso  
210 population is highly clonal. For the concatenated dataset, the average GC content was 38.9%.  
211 Overall, 143/5415 nucleotide sites examined here are polymorphic, which indicates that Lso is  
212 genetically rather uniform. For neutrality tests, no significant departure from neutrality was  
213 observed on the overall dataset with the Tajima’s D test (Table 3).  
214

214

### 215 **MLSA based on concatenated gene sequences**

216 The phylogenetic tree generated from the concatenated sequences of the seven housekeeping  
217 genes (*acnA*, *atpD*, *ftsZ*, *glnA*, *glyA*, *gnd* and *groEL*) showed six well defined groups. High  
218 bootstrap values indicated that this clustering was well supported and that the phylogenetic tree  
219 was robust (Figure 2). The first group (LsoB) is composed of three strains isolated in the United  
220 States: one from *S. tuberosum*, one from *B. cockerelli* and the sequenced strain ZC1. The second



221 group (LsoC) consists of one strain isolated in Finland from *T. apicalis* and the sequenced  
222 strains FIN111 and FIN114. The third group (LsoA) was identified from one strain isolated  
223 from *B. cockerelli* in the United States, one strain isolated from *S. lycopersicum* in New  
224 Zealand, and the sequenced strains NZ1, RSTM and HenneA. The fourth group (LsoD)  
225 included strain haplotype D1 from Israel, one strain isolated in Spain from carrot plants, one  
226 strain isolated in Morocco from carrot plants, and 14 strains isolated in France: 12 from carrot  
227 plants, one from *B. trigonica* and one from parsley. The fifth group (LsoE) included two strains  
228 isolated from Spain: one from *B. trigonica* and one from carrot plants, and 17 strains isolated  
229 from France (nine from carrot plants, one from *B. trigonica*, three from parsley, one from celery,  
230 one from fennel, one from parsnip and one from chervil) (Table 1). In addition to these five  
231 groups, which correspond to the five Lso haplotypes described so far, our phylogenetic tree  
232 revealed the presence of a sixth haplotype, designated LsoG. This new haplotype clustered two  
233 strains from France (17/0021-2c and 17/0021-2d). The bootstrap value (95) of the LsoG group  
234 depicted the robustness of this phylogenetically novel population (Figure 2).  
235

236 Regarding the phylogenetic relationships between the 49 tested Lso strains, a close relatedness  
237 was observed between LsoD, LsoE and LsoG. These three haplotypes appeared to be more  
238 closely related to LsoA than to LsoC. Strains of LsoB formed a cluster that was the most  
239 genetically distant from the other five Lso haplotypes (Figure 2). Based on our MLSA analysis,  
240 strains that are pathogenic on a same plant species or family were displayed in very divergent  
241 groups. This was the case of LsoA and LsoB, both pathogenic on solanaceous crops, which did  
242 not group together on the basis of our sequence data. For apiaceous haplotypes, LsoC form a  
243 distinct phylogenetic group that was clearly separated from the three other apiaceous haplotypes  
244 (LsoD, LsoE and LsoG) (Figure 2). These observations suggest that host specificity is not  
245 correlated to Lso classification based on our phylogenetic data.  
246

## 247 **Individual gene phylogenies**

248 Individual phylogenetic trees were constructed using the maximum likelihood method and are  
249 shown in Figures S1 to S7. The tree topologies constructed from single genes presented roughly  
250 congruent phylogenies. Some differences were observed in the topology of the individual  
251 phylogenetic trees. For example, LsoC appears to be more closely related to the other apiaceous  
252 haplotypes in the phylogenetic trees built with the *acnA*, *glnA* and *glyA* genes. This was not the  
253 case for the trees built with the four other genes (*atpD*, *ftsZ*, *gnd* and *groEL*) since LsoC form  
254 a cluster that was phylogenetically distant from the cluster formed by the other apiaceous  
255 haplotypes.

256  
257 All the individual phylogenetic trees confirmed the structuration of the tested Lso strains into  
258 five groups (LsoA, LsoB, LsoC, LsoD and LsoE), with the formation of a sixth group (LsoG)  
259 in the *glnA*, *glyA*, *groEL* and *ftsZ* phylogenetic trees (Figures S1 to S7). The gene sequences  
260 from LsoG strains had distinct sequences in these four housekeeping genes: they exhibited one  
261 new SNP in the *glnA* gene, one new SNP in the *glyA* gene and one new SNP in the *groEL* gene  
262 (Table 4). In addition, the *ftsZ* gene sequences from these two strains varied from the *ftsZ* gene  
263 sequences of the other LsoD strains by two nucleotide substitutions (Table 4). Regarding LsoE,  
264 all tested strains have identical sequences except for the *atpD* gene (Figures S1 to S7), for which  
265 two strains (14/427.3 from France and 15/150.5 from Spain) exhibited a different allele from

266 the other LsoE strains (presence of G instead of T at position 321 of the aligned sequence of  
267 the *atpD* gene).  
268

## 269 Discussion

270 Lso is an emerging phytopathogenic bacterium which is responsible for several economically  
271 important diseases on solanaceous and apiaceous crops worldwide (Soliman et al., 2013;  
272 Haapalainen, 2014). Previous sequence-based analyses of the genetic diversity of Lso have only  
273 targeted genes of the ribosomal operon (Lin et al., 2009; Wen et al., 2009; Nelson et al., 2011).  
274 These data, however, were obtained based on the analysis of a single locus, which may not  
275 provide enough information for discrimination between different Lso strains (Lin and  
276 Gudmestad, 2013). Since the publication of the first Lso genome sequence (Lin et al., 2011), a  
277 number of loci including SSR and MLST markers were used to define the genetic relationships  
278 among solanaceous Lso haplotypes (LsoA and LsoB) (Lin et al., 2012; Glynn et al., 2012). A  
279 more recent study investigated the genetic variability of LsoC strains in Finland by MLST  
280 (Haapalainen et al., 2018). These genetic diversity studies did not take into account LsoD and  
281 LsoE variability. Thus, an updated phylogeny of Lso strains representing the five established  
282 haplotypes is lacking. In recent years, the MLSA approach has shed new light on prokaryotic  
283 phylogeny, and has been widely used in the classification and identification of diverse bacterial  
284 species (Gevers et al., 2005; Almeida et al., 2010; Glaeser and Kämpfer, 2015). In this study,  
285 we established a new MLSA scheme based on seven housekeeping genes (*acnA*, *atpD*, *ftsZ*,  
286 *glnA*, *glyA*, *gnd* and *groEL*) for a representative collection of 49 Lso strains. The availability of  
287 5415 bp of sequence data from each of the 49 strains gives an important resource to understand  
288 the extent and nature of genetic diversity within this bacterial species.  
289

290 Considering the seven housekeeping genes used in this study, 143 polymorphic sites in 5415  
291 bp of sequence were identified. No insertions/deletions were found in the analyzed sequences.  
292 The seven loci were informative, with *glnA* being the most variable gene. In addition to point  
293 mutations, bacterial evolution may be driven by recombination which is considered as one of  
294 the most important processes that increase genetic variability in bacterial genomes (Feil and  
295 Spratt, 2001; Martin et al., 2011). Due to the association of LsoA and LsoB with the same  
296 solanaceous crops and the same vector (*B. cockerelli*) (Munyaneza et al., 2007; Lin et al., 2012),  
297 recombination between these two haplotypes could occur. Within apiaceous haplotypes, we  
298 would expect recombination to occur between LsoD and LsoE since they are both associated  
299 with *B. trigonica* (Alfaro-Fernández et al., 2012b; Teresani et al., 2014; Tahzima et al., 2017)  
300 whereas LsoC is vectored by a different psyllid species (*T. apicalis*) (Munyaneza et al., 2010b).  
301 Recombination events were estimated on each locus. No recombination events were detected  
302 whatever the data analyzed. The absence of recombination for housekeeping genes was  
303 previously reported for other phytopathogenic bacteria such as *Ralstonia solanacearum* and  
304 *Xanthomonas* species (Castillo and Greenberg, 2007; Bui Thi Ngoc et al., 2010; Hajri et al.,  
305 2012). Housekeeping genes are components of the 'core genome' and typically encode proteins  
306 essential for the organism's survival. These genes are present in all strains of a bacterial species  
307 and usually evolve slowly (Sarkar and Guttman, 2004). In the frame of this study, the levels of  
308 selection acting on the tested housekeeping genes were evaluated with two population genetic  
309 tests. Tajima's D statistic did not produce significant results. In addition, all dN/dS were less  
310 than 1, indicating that the seven tested loci appeared to be under purifying selection, as expected  
311 for genes chosen for MLSA studies. Taken together, our data revealed a high clonality for  
312 housekeeping genes and support a predominant role of mutation in shaping the genetic diversity  
313 of Lso.

314

315 Previous genetic studies based on the sequencing of three ribosomal gene loci (16S rRNA,  
316 16S/23S ISR and 50S *rpIJ-rpIL*) led to consider Lso as a species complex constituted of five  
317 haplotypes (LsoA, LsoB, LsoC, LsoD and LsoE) (Nelson et al., 2011, 2013; Teresani et al.,  
318 2014). Our MLSA data showed that differences between the five haplotypes are not restricted  
319 to the rRNA operon and are present within the core genome. The phylogenetic tree based on  
320 concatenated sequences of the seven housekeeping genes confirmed the clustering of Lso  
321 strains into five evolutionary lineages that correspond to the five previously described Lso  
322 haplotypes, supporting the hypothesis of Nelson et al (2011) that Lso haplotypes represent  
323 stable haplotypes. This clear correspondence between phylogenetic clustering and haplotype  
324 classification was also supported by phylogenetic trees based on individual loci. The *atpD*, *ftsZ*,  
325 *gnd* and *groEL* phylogenetic trees were found to be congruent with the tree generated from the  
326 concatenated data, indicating a common evolutionary history for these four genes. However,  
327 the *acnA*, *glnA* and *glyA* gene phylogenies did not accurately represent the same evolutionary  
328 history as the other tested genes. The main incongruence concerned the position of LsoA, LsoB  
329 and LsoC. A recent phylogenetic analysis based on 88 single-copy orthologs of the bacterial  
330 core genome showed that LsoA is more closely related to LsoC than to LsoB (Wang et al.,  
331 2017). This topology is in agreement with the *atpD*, *ftsZ*, *gnd* and *groEL* phylogenies, indicating  
332 that these genes are more reliable to reflect the phylogenetic relationships among Lso  
333 haplotypes. In addition, our phylogenetic data revealed a clear separation between the cluster  
334 formed by LsoD and LsoE on the one hand and the cluster formed by LsoC on the other hand,  
335 although displaying the same host range. Similarly, LsoA and LsoB which are both associated  
336 with solanaceous crops, did not cluster together on the basis of our phylogenetic analysis. Thus,  
337 no clear correspondence could be established between clustering of Lso strains and their host  
338 specificities on the basis of our phylogenetic data. When considering the insect vector, our  
339 phylogenetic analysis suggests that clustering of Lso strains associated with apiaceous crops  
340 may be explained by differences in insect vector. Indeed, LsoD and LsoE, which appeared to  
341 be very close phylogenetically, share the same insect vector (*B. trigonica*) (Alfaro-Fernández  
342 et al., 2012b; Teresani et al., 2014; Tahzima et al., 2017), whereas LsoC which forms a more  
343 distant cluster, is associated with a different psyllid species (*T. apicalis*) (Munyaneza et al.,  
344 2010b). The genetic relatedness of LsoD and LsoE was reported previously based on sequence  
345 analysis of the 50S *rpIJ-rpIL* gene (Hajri et al., 2017). For solanaceous haplotypes, this is not  
346 true since LsoA and LsoB, which are both associated with *B. cockerelli*, did not cluster together  
347 on the basis of our phylogenetic analysis. Altogether, the results presented here strongly suggest  
348 that the current host plant range and the vector psyllid associations of the different Lso  
349 haplotypes are not congruent with Lso phylogeny, as previously suggested by Haapalainen  
350 (2014).

351

352 The present study not only clarifies the phylogenetic relationships among Lso haplotypes but  
353 also reveals a part of the unknown genetic diversity of the bacterium. In addition to the five  
354 previously described Lso haplotypes (LsoA, LsoB, LsoC, LsoD and LsoE), our phylogenetic  
355 data revealed the presence of a sixth haplotype, designated LsoG, This new genetically distinct  
356 group is represented by two strains (17/0021-2c and 17/0021-2d) from France and is associated  
357 with asymptomatic carrots. Our sequence analysis revealed that the new haplotype G had  
358 distinct sequences in four out of the seven tested housekeeping genes: one new SNP in the *glnA*  
359 gene, one new SNP in the *groEL* gene, one new SNP in the *glyA* gene and one different allelic  
360 form in the *ftsZ* gene. In the phylogenetic tree based on the concatenated gene sequences, strains  
361 17/0021-2c and 170021-2d form a very tight and homogeneous cluster which is clearly separate  
362 from the other Lso haplotypes. Because strains 17/0021-2c and 17/0021-2d were isolated from



363 the same geographical region, it is tempting to speculate that the newly described haplotype G  
364 is a genetically structured population based on geographical area. To support this hypothesis,  
365 further characterization of additional representative strains of LsoG is now necessary. Although  
366 the haplotype nomenclature system has been useful in an agricultural context, its biological  
367 justification is questionable since there are no biological distinctions that reliably differentiate  
368 Lso haplotypes (Lin and Gudmestad, 2013). Thus, haplotype designation within Lso should  
369 take into account both the genetic diversity and biological traits of the strains (Haapalainen,  
370 2014; Munyaneza, 2015). More recently, two novel haplotypes (LsoU and LsoF) was identified  
371 in Finland from the psyllid *Triozia urticae* and its host plant *Urtica dioica*, and in the USA in  
372 potato tuber (Haapalainen et al., 2018; Swisher-Grimm and Garczynski, 2018). The  
373 identification of three novel haplotypes (LsoU in Finland, LsoF in USA and LsoG in France)  
374 indicates that genetic diversity of Lso is much higher than previously expected. In our study,  
375 we focused on housekeeping genes which provide substantial evidence that strains 17/0021-2c  
376 and 17/0021-2d represent a new Lso haplotype. However, we cannot exclude the possibility  
377 that genetic variation among these strains is present elsewhere in the genome. Further work on  
378 the biological traits (*i.e.* host range) of these two strains and further sequencing of more variable  
379 genes like those involved in virulence are now necessary to confirm the status of this new  
380 haplotype.

381

382 The interaction between Lso and its host plants is strongly influenced by the ecological niche,  
383 the insect vector and the evolution of bacterial pathogenicity determinants (Lin and Gudmestad,  
384 2013; Haapalainen, 2014). Currently, little is known about pathogenicity determinants that can  
385 account for the differing host specificities between Lso haplotypes. Previous comparative  
386 genomic studies focused only on LsoA, LsoB and LsoC and revealed relevant differences in  
387 the genome organization between these haplotypes (Lin et al., 2011; Thompson et al., 2015;  
388 Wang et al., 2017). However, these studies did not take into account haplotypes D and E since  
389 no published genome sequence is available for LsoE and a draft genome sequence of LsoD was  
390 made available only recently in Genbank. Notably, our MLSA data highlighted interesting  
391 features for LsoD and LsoE: (i) they are very closely related, but phylogenetically distinct; (ii)  
392 they form a cluster that is clearly separated from LsoC which is also pathogenic on apiaceous  
393 crops. In addition, a recent study reveals that the newly described LsoU haplotype is more  
394 closely related to LsoD and LsoA than to LsoC (Haapalainen et al., 2018). Altogether, these  
395 observations raise interesting questions about the genomic basis of adaptation to the host of Lso  
396 haplotypes. Sequencing of LsoE, LsoF, LsoU and LsoG genomes is now necessary to perform  
397 a whole comparative genomic analysis at the species level which may enable the identification  
398 of specific-haplotype genes. Such traits are excellent candidates to better understand the genetic  
399 basis of the host range differences that exist between apiaceous and solanaceous haplotypes and  
400 the factors involved in vector/plant host interactions. In this article, we have described the  
401 genetic structure of Lso with special emphasis on housekeeping genes. However, the population  
402 structure of a bacterium can also be tracked by focusing on other informative genetic markers  
403 such as phage-related genes that could be linked to virulence. The potential contribution of  
404 prophages and phage-related sequences to the genetic diversity of *Liberibacter* species has been  
405 investigated more extensively in '*Ca. L. asiaticus*' (Zhou et al., 2013; Puttamuk et al., 2014;  
406 Zheng et al., 2016, 2018). Furthermore, Thompson *et al.*(2015) highlighted that the most  
407 important difference between the two genome sequences of LsoA is the location of their  
408 prophage domains. Profiling the phage-related genes of Lso strains from different geographic  
409 origin could help to better decipher the evolutionary forces responsible for the haplotype  
410 diversification within this bacterial species and to identify the sources of disease outbreaks or  
411 incursions.

412

413 **Author contributions**

414 AH: conceived and designed the experiments, analyzed and interpreted the data, wrote the  
415 paper; PCS: performed the experiments; PG: revised the manuscript; ML: analyzed the data  
416 with the maximum likelihood method and revised the manuscript.

417

418 **Funding**

419 This study was partially supported by funding from the European Union's Horizon 2020  
420 research and innovation programme under grant agreement No 635646: POnTE (Pest  
421 Organisms Threatening Europe) and by funding from the French ministry of agriculture under  
422 grant agreement C-2015-09 n°2101755701: CaLiso.

423

424 **Acknowledgments**

425 We gratefully thank the partners of the CaLiso project (FNAMS, CTIFL, Fredon Centre,  
426 chambre d'Agriculture de la Marne, UFS) for providing us a part of the French Lso isolates  
427 used in this study. We also thank Joseph Munyaneza, Sarah Thompson, Anne Nissinen, Alberto  
428 Fereres, Felipe Siverio de la Rosa and Stephanie Mallard for kindly providing us with Lso  
429 strains from USA, New Zealand, Finland, Spain, Canary Islands and Morocco.

430

431 **References**

432 Alfaro-Fernández, A., Cebrián, M. C., Villaescusa, F. J., Hermoso de Mendoza, A., Ferrándiz,  
433 J. C., Sanjuán, S., et al. (2012a). First report of '*Candidatus Liberibacter solanacearum*' in  
434 carrots in mainland Spain. *Plant Dis.* 96:582. doi: 10.1094/PDIS-11-11-0918-PDN

435

436 Alfaro-Fernández, A., Siverio, F., Cebrián, M. C., Villaescusa, F. J., and Font, M. I. (2012b).  
437 '*Candidatus Liberibacter solanacearum*' associated with *Bactericera trigonica*-affected carrots  
438 in the Canary Islands. *Plant Dis.* 96:581. doi: 10.1094/PDIS-10-11-0878-PDN

439

440 Alfaro-Fernández, A., Hernández-Llopis, D., and Font, M. I. (2017). Haplotypes of  
441 '*Candidatus Liberibacter solanacearum*' identified in Umbeliferous crops in Spain. *Eur. J. Plant*  
442 *Pathol.* 149, 127-131. doi: 10.1007/s10658-017-1172-2

443 Almeida, N. F., Yan, S., Cai, R., Clarke, C. R., Morris, C. E., Schaad, N. W., et al. (2010).  
444 PAMDB, a multilocus sequence typing and analysis database and website for plant-associated  
445 microbes. *Phytopathology* 100, 208-215. doi: 10.1094/PHYTO-100-3-0208

446 Bui Thi Ngoc, L., Vernière, C., Jarne, P., Brisse, S., Guérin, F., Boutry, S., et al. (2009). From  
447 local surveys to global surveillance: three high throughput genotyping methods for the  
448 epidemiological monitoring of *Xanthomonas citri* pv. *citri* pathotypes. *Appl. Environ.*  
449 *Microbiol.* 75, 1173-1184. doi: 10.1128/AEM.02245-08

450

451 Castillo, J. A., and Greenberg, J. T. (2007). Evolutionary dynamics of *Ralstonia solanacearum*.  
452 *Appl. Environ. Microbiol.* 73, 1225-1238. doi: 10.1128/AEM.01253-06

453

- 454 Constantin, E. C., Cleenwerck, I., Maes, M., Baeyen, S., Van Malderghem, C., De Vos, P., et  
455 al. (2016). Genetic characterization of strains named as *Xanthomonas axonopodis* pv.  
456 *dieffenbachiae* leads to a taxonomic revision of the *X. axonopodis* species complex. Plant  
457 Pathol. 65, 792-806. doi: 10.1111/ppa.12461
- 458  
459 Cooper, J. E., and Feil, E. J. (2004). Multilocus sequence typing - what is resolved. Trends  
460 Microbiol. 12, 373-377. doi: 10.1016/j.tim.2004.06.003
- 461  
462 Duan, Y. P., Zhou, L. J., Hall, D. G., Li, W. B., Doddapaneni, H., Lin, H., et al. (2009).  
463 Complete genome sequence of citrus huanglongbing bacterium, '*Candidatus* Liberibacter  
464 asiaticus' obtained through metagenomics. Mol. Plant Microbe Interact. 22, 1011-1020. doi:  
465 10.1094/MPMI-22-8-1011
- 466  
467 Feil, E. J., and Spratt, B. G. (2001). Recombination and the population structures of bacterial  
468 pathogens. Annu. Rev. Microbiol. 55, 561-590. doi: 10.1146/annurev.micro.55.1.561
- 469  
470 Gevers, D., Cohan, F. M., Lawrence, J. G., Spratt, B. G., Coenye, T., Feil, E. J., et al. (2005).  
471 Re-evaluating prokaryotic species. Nat.Rev. Microbiol. 3, 733-739. doi: 10.1038/nrmicro1236
- 472  
473 Glaeser, S.P., and Kämpfer, P. (2015). Multilocus sequence analysis (MLSA) in prokaryotic  
474 taxonomy. Syst. Appl. Microbiol. 38, 237-245. doi: 10.1016/j.syapm.2015.03.007
- 475  
476 Glynn, J. M., Islam, M. S., Bai, Y., Lan, S., Wen, A., Gudmestad, N. C., et al. (2012). Multilocus  
477 sequence typing of '*Candidatus* Liberibacter solanacearum' isolates from North America and  
478 New Zealand. J. Plant Pathol. 94, 223-228. doi: 10.4454/jpp.fa.2012.007
- 479  
480 Haapalainen, M. (2014). Biology and epidemics of '*Candidatus* Liberibacter' species, psyllid-  
481 transmitted plant-pathogenic bacteria. Ann. Appl. Biol. 165, 172-198. doi: 10.1111/aab.12149
- 482  
483 Haapalainen, M., Kivimäki, P., Latvala, S., Rastas, M., Hannukkala, A., Jauhiainen, L., et al.  
484 (2017). Frequency and occurrence of the carrot pathogen '*Candidatus* Liberibacter  
485 solanacearum' haplotype C in Finland. Plant Pathol. 66, 559-570. doi: 10.1111/ppa.12613
- 486  
487 Haapalainen, M., Wang, J., Latvala, S., Lehtonen, M. T., Pirhonen, M., and Nissinen, A. I.  
488 (2018). Genetic variation of '*Candidatus* Liberibacter solanacearum' haplotype C and  
489 identification of a novel haplotype from *Trioza urticae* and stinging nettle. Phytopathology, "in  
490 press ". doi: 10.1094/PHYTO-12-17-0410-R
- 491  
492 Hajri, A., Brin, C., Zhao, S., David, P., Feng, J.-X., Koebnik, R., et al. (2012). Multilocus  
493 sequence analysis and type III effector repertoire mining provide new insights into the  
494 evolutionary history and virulence of *Xanthomonas oryzae*. Mol. Plant Pathol. 13, 288-302.  
495 doi : 10.1111/j.1364-3703.2011.00745.x
- 496  
497 Hajri, A., Loiseau, M., Cousseau-Suhard, P., Renaudin, I., and Gentit, P. (2017). Genetic  
498 characterization of '*Candidatus* Liberibacter solanacearum' haplotypes associated with  
499 apiaceous crops in France. Plant Dis. 101, 1383-1390. doi: 10.1094/PDIS-11-16-1686-RE
- 500  
501 Hall, T. A. (1999). BioEdit: a user-friendly biological sequence alignment editor and analysis  
502 program for Windows 95/98/NT. Nucleic Acids Symp. Ser. 41, 95-98.

- 503 Hansen, A. K., Trumble, J. T., Stouthamer, R., and Paine, T. D. (2008). A new Huanglongbing  
504 (HLB) species, “*Candidatus Liberibacter psyllaurous*”, found to infect tomato and potato, is  
505 vectored by the psyllid *Bactericera cockerelli* (Sulc). *Appl. Environ. Microbiol.* 74, 5862-5865.  
506 doi: 10.1128/AEM.01268-08  
507
- 508 Huang, X., and Madan, A. (1999). CAP3: A DNA sequence assembly program. *Genome Res.*  
509 9, 868-877. doi: 10.1101/gr.9.9.868  
510
- 511 Kimura, M. (1980). A simple method for estimating evolutionary rates of base substitutions  
512 through comparative studies of nucleotide sequences. *J. Mol. Evol.* 16, 111-120.
- 513 Kumar, S., Stecher, G., and Tamura, K. (2016). MEGA7: Molecular Evolutionary Genetics  
514 Analysis version 7.0 for bigger datasets. *Mol. Biol. Evol.* 33: 1870-1874. doi:  
515 10.1093/molbev/msw054
- 516 Librado, P., and Rozas, J. (2009). DnaSP v5: a software for comprehensive analysis of DNA  
517 polymorphism data. *Bioinformatics* 25, 1451-1452. doi: 10.1093/bioinformatics/btp187  
518
- 519 Liefing, L., Perez-Egusquiza, Z., Clover, G., and Anderson, J. (2008a). A new ‘*Candidatus*  
520 *Liberibacter*’ species in *Solanum tuberosum* in New Zealand. *Plant Dis.* 92:1474. doi:  
521 10.1094/PDIS-92-10-1474A  
522
- 523 Liefing, L. W., Ward, L. I., Shiller, J. B., and Clover, G. R. G. (2008b). A new ‘*Candidatus*  
524 *Liberibacter*’ species in *Solanum betaceum* (tamarillo) and *Physalis peruviana* (cape  
525 gooseberry) in New Zealand. *Plant Dis.* 92:1588. doi: 10.1094/PDIS-92-11-1588B  
526
- 527 Lin, H., and Gudmestad, N. C. (2013). Aspects of Pathogen genomics, diversity, epidemiology,  
528 vector dynamics, and disease management for a newly emerged disease of potato: zebra chip.  
529 *Phytopathology* 103, 524-537. doi: 10.1094/PHYTO-09-12-0238-RVW  
530
- 531 Lin, H., Doddapaneni, H., Munyaneza, J. E., Civerolo, E. L., Sengoda, V. G., Buchman, J. L.,  
532 et al. (2009). Molecular characterization and phylogenetic analysis of 16S rRNA from a new  
533 “*Candidatus Liberibacter*” strain associated with zebra chip disease of potato (*Solanum*  
534 *tuberosum* L.) and the potato psyllid (*Bactericera cockerelli* Sulc). *J. Plant Pathol.* 91, 215-219.  
535 doi: 10.4454/jpp.v91i1.646  
536
- 537 Lin, H., Lou, B., Glynn, J. M., Doddapaneni, H., Civerolo, E. L., Chen, C., et al. (2011). The  
538 complete genome sequence of ‘*Candidatus Liberibacter solanacearum*’, the bacterium  
539 associated with potato zebra chip disease. *PLoS ONE* 6:e19135. doi:  
540 10.1371/journal.pone.0019135  
541
- 542 Lin, H., Islam, M. S., Bai, Y., Wen, A., Lan, S., Gudmestad, N. C., et al. (2012). Genetic  
543 diversity of ‘*Candidatus Liberibacter solanacearum*’ strains in the United States and Mexico  
544 revealed by simple sequence repeat markers. *Eur. J. Plant Pathol.* 132, 297-308. doi:  
545 10.1007/s10658-011-9874-3  
546
- 547 Ling, K. S., Lin, H., Ivey, M. L. L., Zhang, W., and Miller, S. (2011). First report of ‘*Candidatus*  
548 *Liberibacter solanacearum*’ naturally infecting tomatoes in the state of Mexico, Mexico. *Plant*  
549 *Dis.* 95:1026. doi: 10.1094/PDIS-05-11-0365  
550

- 551 Loiseau, M., Garnier, S., Boirin, V., Merieau, M., Leguay, A., Renaudin, I., et al. (2014). First  
552 Report of ‘*Candidatus Liberibacter solanacearum*’ in carrot in France. *Plant Dis.* 98:839. doi:  
553 10.1094/PDIS-08-13-0900-PDN  
554
- 555 Macheras, E., Roux, A. L., Bastian, S., Leao, S. C., Palaci, M., Sivadon-Tardy, V., et al. (2011).  
556 Multilocus sequence analysis and *rpoB* sequencing of *Mycobacterium abscessus* (Sensu Lato)  
557 strains. *J. Clin. Microbiol.* 49, 491-499. doi: 10.1128/JCM.01274-10  
558
- 559 Martin, D. P., Lemey, P., and Posada, D. (2011). Analysing recombination in nucleotide  
560 sequences. *Mol. Ecol. Resour.* 11, 943-955. doi: 10.1111/j.1755-0998.2011.03026.x  
561
- 562 Martin, D. P., Murrell, B., Golden, M., Khoosal, A., and Muhire, B. (2015). RDP4: Detection  
563 and analysis of recombination patterns in virus genomes. *Virus Evol.* 1:vev003. doi:  
564 10.1093/ve/vev003  
565
- 566 Mawassi, M., Dror, O., Bar-Joseph, M., Piasezky, A., Sjölund, M. J., Levitzky, N., et al. (2018).  
567 ‘*Candidatus Liberibacter solanacearum*’ is Tightly Associated with Carrot Yellows Symptoms  
568 in Israel and Transmitted by the Prevalent Psyllid Vector *Bactericera trigonica*.  
569 *Phytopathology*, "in press ". doi: 10.1094/PHYTO-10-17-0348-R  
570
- 571 Monger, W. A., and Jeffries, C. J. (2018). A survey of ‘*Candidatus Liberibacter solanacearum*’  
572 in historical seed from collections of carrot and related Apiaceae species. *Eur. J. Plant Pathol.*  
573 150, 803-815. doi: 10.1007/s10658-017-1322-6  
574
- 575 Munyaneza, J. E. (2015). Zebra chip disease, *Candidatus liberibacter*, and potato psyllid: A  
576 global threat to the potato industry. *Am. J. Potato Res.* 92, 230-235. doi: 10.1007/s12230-015-  
577 9448-6  
578
- 579 Munyaneza, J. E., Crosslin, J. M., and Upton, J. E. (2007). Association of *Bactericera cockerelli*  
580 (Homoptera: Psyllidae) with “zebra chip”, a new potato disease in southwestern United States  
581 and Mexico. *J. Econ. Entomol.* 100, 656-663. doi: 10.1093/jee/100.3.656  
582
- 583 Munyaneza, J. E., Fisher, T. W., Sengoda, V. G., Garczynski, S. F., Nissinen, A., and  
584 Lemmetty, A. (2010a). First report of ‘*Candidatus Liberibacter solanacearum*’ associated with  
585 psyllid-affected carrots in Europe. *Plant Dis.* 94:639. doi: 10.1094/PDIS-94-5-0639A  
586
- 587 Munyaneza, J. E., Fisher, T. W., Sengoda, V. G., Garczynski, S. F., Nissinen, A., and  
588 Lemmetty, A. (2010b). Association of “*Candidatus Liberibacter solanacearum*” with the psyllid  
589 *Trioza apicalis* (Hemiptera: Triozidae) in Europe. *J. Econ. Entomol.* 103, 1060-1070. doi:  
590 10.1603/EC10027  
591
- 592 Munyaneza, J. E., Sengoda, V. G., Stegmark, R., Arvidsson, A. K., Anderbrant, O., Yuvaraj, J.  
593 K., et al. (2012a). First report of “*Candidatus Liberibacter solanacearum*” associated with  
594 psyllid-affected carrots in Sweden. *Plant Dis.* 96:453. doi: 10.1094/PDIS-10-11-0871  
595
- 596 Munyaneza, J. E., Sengoda, V. G., Sundheim, L., and Meadow, R. (2012b). First report of  
597 “*Candidatus Liberibacter solanacearum*” associated with psyllid-affected carrots in Norway.  
598 *Plant Dis.* 96:454. doi: 10.1094/PDIS-10-11-0870  
599



- 600 Munyaneza, J. E., Swisher, K. D., Hommes, M., Willhauck, A., Buck, H., and Meadow, R.  
601 (2015). First Report of ‘*Candidatus Liberibacter solanacearum*’ Associated With Psyllid-  
602 Infested Carrots in Germany. *Plant Dis.* 99:1269. doi: 10.1094/PDIS-02-15-0206-PDN  
603
- 604 Munyaneza, J. E., Mustafa, T., Fisher, T. W., Sengoda, V. G., and Horton, D. R. (2016)  
605 Assessing the likelihood of transmission of *Candidatus Liberibacter solanacearum* to carrot by  
606 potato psyllid, *Bactericera cockerelli* (Hemiptera : Triozidae). *PLoS ONE* 11:e0161016. doi:  
607 10.1371/journal.pone.0161016  
608  
609
- 610 Murray, M. G., and Thompson, W. F. (1980). Rapid isolation of high molecular weight plant  
611 DNA. *Nucl. Acids Res.* 8, 4321-4326. doi: 10.1093/nar/8.19.4321  
612
- 613 Nei, M., and Gojobori, T. (1986). Simple methods for estimating the numbers of synonymous  
614 and nonsynonymous nucleotide substitutions. *Mol. Biol. Evol.* 3, 418-426.  
615
- 616 Nei, M. (1987). *Molecular Evolutionary Genetics*. New York, NY: Columbia University Press.  
617
- 618 Nelson, W. R., Fisher, T. W., and Munyaneza, J. E. (2011). Haplotypes of “*Candidatus*  
619 *Liberibacter solanacearum*” suggest long-standing separation. *Eur. J. Plant Pathol.* 130, 5-12.  
620 doi: 10.1007/s10658-010-9737-3  
621
- 622 Nelson, W. R., Sengoda, V. G., Crosslin, J. M., Alfaro-Fernández, A. O., Font, M. I., and  
623 Munyaneza, J. E. (2013). A new haplotype of “*Candidatus Liberibacter solanacearum*” in the  
624 Mediterranean region. *Eur. J. Plant Pathol.* 135, 633-639. doi: 10.1007/s10658-012-0121-3  
625
- 626 Nissinen, A. I., Haapalainen, M., Jauhiainen, L., Lindman, M., and Pirhonen, M. (2014).  
627 Different symptoms in carrots caused by male and female carrot psyllid feeding and infection  
628 by ‘*Candidatus Liberibacter solanacearum*’. *Plant Pathol.* 63, 812-820. doi: 10.1111/ppa.12144
- 629 Puttamuk, T., Zhou, L. J., Thaveechai, N., Zhang, S. A., Armstrong, C. M., and Duan, Y. P.  
630 (2014). Genetic diversity of *Candidatus Liberibacter asiaticus* based on two hypervariable  
631 effector genes in Thailand. *PLoS ONE* 9:e112968. doi: 10.1371/journal.pone.0112968
- 632 Sarkar, S. F., and Guttman, D. S. (2004). Evolution of the core genome of *Pseudomonas*  
633 *syringae*, a highly clonal, endemic plant pathogen. *Appl. Environ. Microbiol.* 70, 1999-2012.  
634 doi: 10.1128/AEM.70.4.1999-2012.2004  
635
- 636 Secor, G. A., Rivera-Varas, V., Abad, J. A., Lee, I. M., Clover, G. R. G., Liefting, L. W., et al.  
637 (2009). Association of ‘*Candidatus Liberibacter solanacearum*’ with zebra chip disease of  
638 potato established by graft and psyllid transmission, electron microscopy, and PCR. *Plant Dis.*  
639 93, 574-583. doi: 10.1094/PDIS-93-6-0574  
640
- 641 Soliman, T., Mourits, M. C. M., Oude Lansink, A. G. J. M., and van der Werf, W. (2013).  
642 Economic justification for quarantine status – the case study of *Candidatus Liberibacter*  
643 *Solanacearum* in the European Union. *Plant Pathol.* 62, 1106-1113. doi: 10.1111/ppa.12026  
644
- 645 Swisher Grimm, K.D., Garczynski, S.F. (2018). Identification of a new haplotype of  
646 ‘*Candidatus Liberibacter solanacearum*’ in *Solanum tuberosum*. *Plant Dis.* 10.1094/pdis-06-  
647 18-0937-RE

- 648  
649 Tahzima, R., Maes, M., Achbani, E. H., Swisher, K. D., Munyaneza, J. E., and De Jonghe, K.  
650 (2014). First report of '*Candidatus Liberibacter solanacearum*' on carrot in Africa. *Plant Dis.*  
651 98:1426. doi: 10.1094/PDIS-05-14-0509-PDN  
652
- 653 Tahzima, R., Massart, S., Achbani, E. H., Munyaneza, J. E., and Ouvrard, D. (2017). First report  
654 of '*Candidatus Liberibacter solanacearum*' associated with the psyllid *Bactericera trigonica*  
655 Hodkinson on carrots in northern Africa. *Plant Dis.* 101:242. doi: 10.1094/PDIS-07-16-0964-  
656 PDN  
657
- 658 Tajima, F. (1989). Statistical method for testing the neutral mutation hypothesis by DNA  
659 polymorphism. *Genetics* 123, 585-595.  
660
- 661 Tancos, M. A., Lange, H. W., and Smart, C. D. (2015). Characterizing the genetic diversity of  
662 the *Clavibacter michiganensis* subsp. *michiganensis* population in New York. *Phytopathology*  
663 105, 169-179. doi: 10.1094/PHYTO-06-14-0178-R
- 664 Teresani, G. R., Bertolini, E., Alfaro-Fernández, A., Martínez, C., Tanaka, F. A. O., Kitajima,  
665 E. W., et al. (2014). Association of '*Candidatus Liberibacter solanacearum*' with a vegetative  
666 disorder of celery in Spain and development of real-time PCR method for its detection.  
667 *Phytopathology* 104, 804-811. doi: 10.1094/PHYTO-07-13-0182-R  
668
- 669 Thompson, S. M., Johnson, C. P., Lu, A. Y., Frampton, R. A., Sullivan, K. L., Fiers, M. W. E.  
670 J., et al. (2015). Genomes of '*Candidatus Liberibacter solanacearum*' haplotype A from New  
671 Zealand and the United States suggest significant genome plasticity in the species.  
672 *Phytopathology* 105, 863-871. doi: 10.1094/PHYTO-12-14-0363-FI  
673
- 674 Timilsina, S., Jibrin, M. O., Potnis, N., Minsavage, G. V., Kebede, M., Schwartz, A., et al.  
675 (2015). Multilocus sequence analysis of *xanthomonads* causing bacterial spot of tomato and  
676 pepper plants reveals strains generated by recombination among species and recent global  
677 spread of *Xanthomonas gardneri*. *Appl. Environ. Microbiol.* 81, 1520-1529. doi:  
678 10.1128/AEM.03000-14  
679
- 680 Trantas, E. A., Sarris, P. F., Mpalantinaki, E. E., Pentari, M. G., Ververidis, F. N., and Goumas,  
681 D. E. (2013). A new genomovar of *Pseudomonas cichorii*, a causal agent of tomato pith  
682 necrosis. *Eur. J. Plant Pathol.* 137, 477-493. doi: 10.1007/s10658-013-0258-8  
683
- 684 Wang, J., Haapalainen, M., Schott, T., Thompson, S. M., Smith, G. R., Nissinen, A. I., et al.  
685 (2017). Genomic sequence of '*Candidatus Liberibacter solanacearum*' haplotype C and its  
686 comparison with haplotype A and B genomes. *PLoS ONE* 12:e0171531. doi:  
687 10.1371/journal.pone.0171531  
688
- 689 Watterson, G. A. (1975). On the number of segregating sites in genetical models without  
690 recombination. *Theor. Popul. Biol.* 7, 256-276. doi: 10.1016/0040-5809(75)90020-9  
691
- 692 Wen, A., Mallik, I., Alvarado, V. Y., Pasche, J. S., Wang, X., Li, W., et al. (2009). Detection,  
693 distribution, and genetic variability of '*Candidatus Liberibacter*' species associated with the  
694 zebra complex disease of potato in the North America. *Plant Dis.* 93, 1102-1115. doi:  
695 10.1094/PDIS-93-11-1102  
696

- 697 Wu, F., Deng, X., Liang, G., Wallis, C., Trumble, J. T., Prager, S., et al. (2015). *De Novo*  
698 genome sequence of “*Candidatus Liberibacter solanacearum*” from a single potato psyllid in  
699 California. *Genome Announc.* 3:e01500-15. doi: 10.1128/genomeA.01500-15  
700
- 701 Young, J. M., Park, D. C., Shearman, H. M., and Fargier, E. (2008). A multilocus sequence  
702 analysis of the genus *Xanthomonas*. *Syst. Appl. Microbiol.* 31, 366-377. doi:  
703 10.1016/j.syapm.2008.06.004
- 704 Zheng, Z., Bao, M., Wu, F., Chen, J., and Deng, X. (2016). Predominance of single prophage  
705 carrying a CRISPR/*cas* system in “*Candidatus Liberibacter asiaticus*” strains in southern  
706 China. *PLoS ONE* 11:e0146422. doi: 10.1371/journal.pone.0146422  
707
- 708 Zheng, Z., Bao, M., Wu, F., Van Horn, C., Chen, J., and Deng, X. (2018). A Type 3 Prophage  
709 of ‘*Candidatus Liberibacter asiaticus*’ Carrying a Restriction-Modification System.  
710 *Phytopathology*, 100, 454-461. doi: 10.1094/PHYTO-08-17-0282-R
- 711 Zhou, L., Powell, C., Li, W., and Duan, Y. (2013). Prophage-mediated dynamics of  
712 ‘*Candidatus Liberibacter asiaticus*’ populations, the destructive bacterial pathogens in citrus  
713 huanglongbing. *PLoS ONE* 8:e82248. doi: 10.1371/journal.pone.0082248  
714

715 **Figures**

716

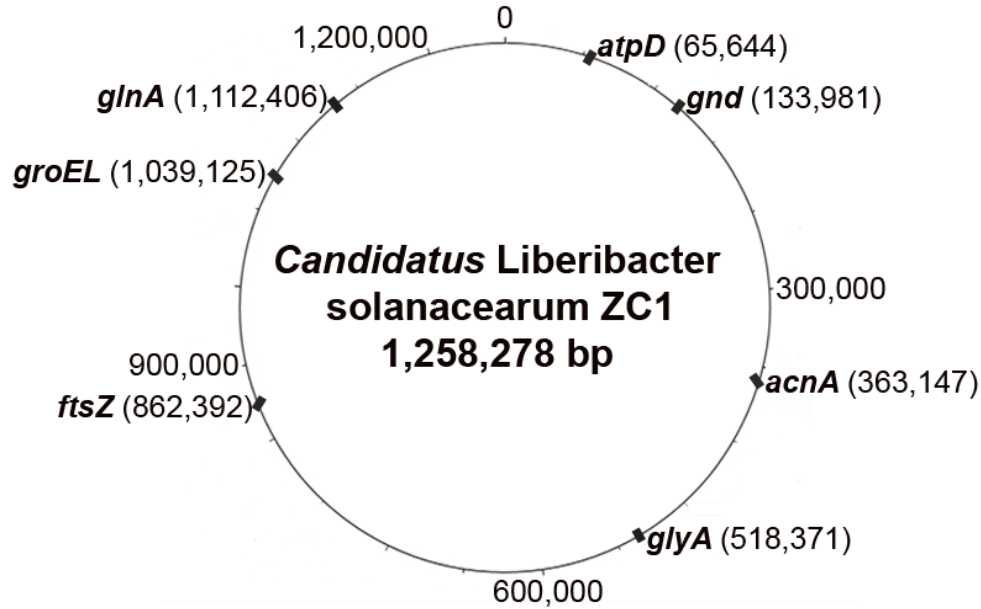

717

718 **Figure 1.** Schematic representation of the positions of the seven housekeeping genes used in  
719 this study based on the sequenced Lso ZC1 genome (Genbank accession number CP002371).

720 The position of each locus (in base pairs) is given between brackets.

721

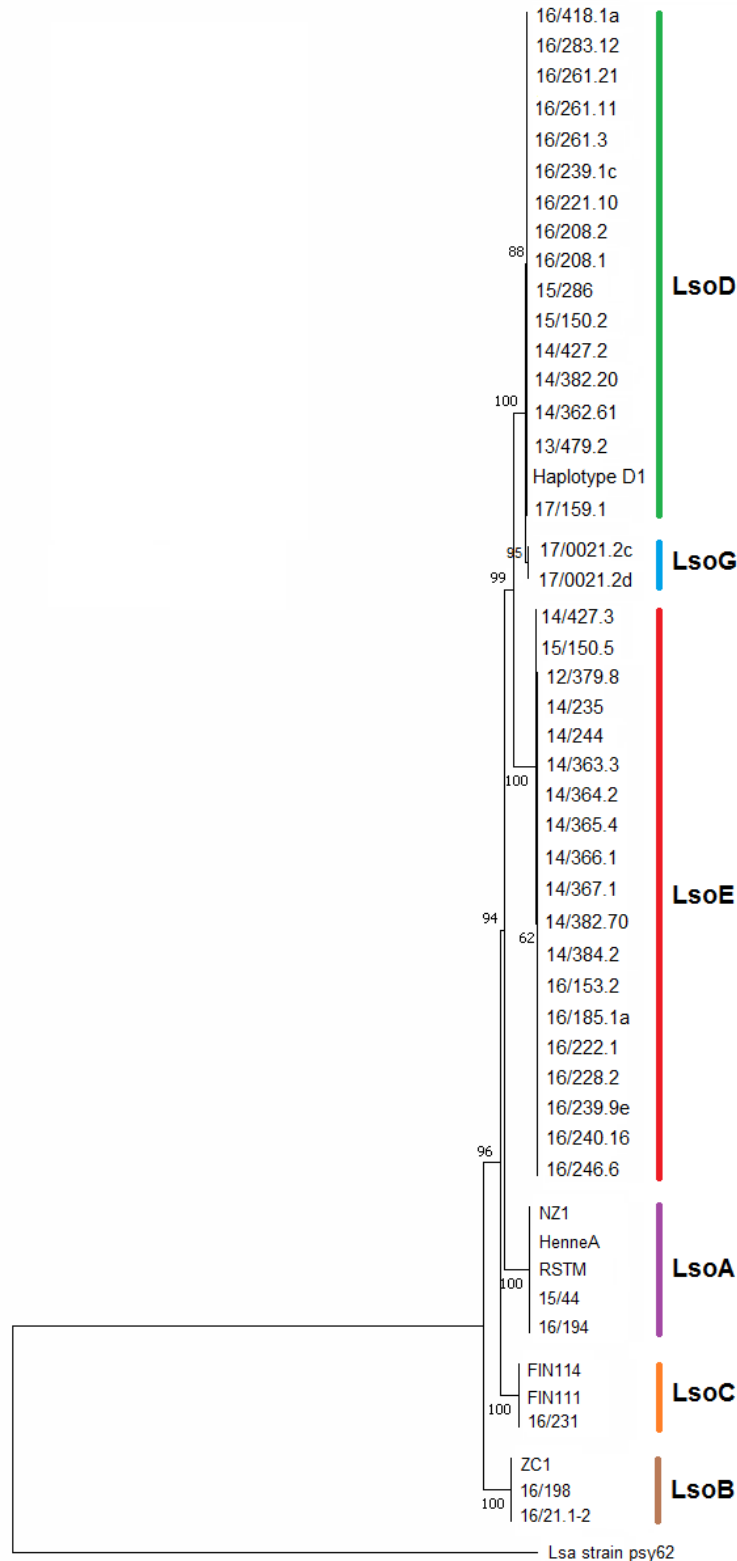

722  
723  
724  
725  
726  
727  
728

**Figure 2.** Phylogenetic tree of the MLSA based on concatenated genes (*acnA*, *atpD*, *ftsZ*, *glnA*, *glyA*, *gnd* and *groEL*) among the 49 Lso strains. The tree is based on 5415 bp of common sequence. The tree was constructed using the maximum likelihood method. The confidence of the nodes was tested with 1,000 bootstrap replicates. The scale bar indicates the number of nucleotide substitutions per site. The tree is rooted with the 'Ca. L. asiaticus' strain psy62.



729 **Supplementary material**

730 **Figure S1.** Phylogenetic tree based on the *acnA* gene among the 49 Lso strains. The tree was  
731 constructed using the maximum likelihood method. Bootstrap values over 50 (1,000 replicates)  
732 were shown at each node. The scale bar indicates the number of nucleotide substitutions per  
733 site. The tree is rooted with the ‘*Ca. L. asiaticus*’ strain psy62.

734  
735 **Figure S2.** Phylogenetic tree based on the *atpD* gene among the 49 Lso strains. The tree was  
736 constructed using the maximum likelihood method. Bootstrap values over 50 (1,000 replicates)  
737 were shown at each node. The scale bar indicates the number of nucleotide substitutions per  
738 site. The tree is rooted with the ‘*Ca. L. asiaticus*’ strain psy62.

739  
740 **Figure S3.** Phylogenetic tree based on the *ftsZ* gene among the 49 Lso strains. The tree was  
741 constructed using the maximum likelihood method. Bootstrap values over 50 (1,000 replicates)  
742 were shown at each node. The scale bar indicates the number of nucleotide substitutions per  
743 site. The tree is rooted with the ‘*Ca. L. asiaticus*’ strain psy62.

744  
745 **Figure S4.** Phylogenetic tree based on the *glnA* gene among the 49 Lso strains. The tree was  
746 constructed using the maximum likelihood method. Bootstrap values over 50 (1,000 replicates)  
747 were shown at each node. The scale bar indicates the number of nucleotide substitutions per  
748 site. The tree is rooted with the ‘*Ca. L. asiaticus*’ strain psy62.

749  
750 **Figure S5.** Phylogenetic tree based on the *glyA* gene among the 49 Lso strains. The tree was  
751 constructed using the maximum likelihood method. Bootstrap values over 50 (1,000 replicates)  
752 were shown at each node. The scale bar indicates the number of nucleotide substitutions per  
753 site. The tree is rooted with the ‘*Ca. L. asiaticus*’ strain psy62.

754  
755 **Figure S6.** Phylogenetic tree based on the *gnd* gene among the 49 Lso strains. The tree was  
756 constructed using the maximum likelihood method. Bootstrap values over 50 (1,000 replicates)  
757 were shown at each node. The scale bar indicates the number of nucleotide substitutions per  
758 site. The tree is rooted with the ‘*Ca. L. asiaticus*’ strain psy62.

759  
760 **Figure S7.** Phylogenetic tree based on the *groEL* gene among the 49 Lso strains. The tree was  
761 constructed using the maximum likelihood method. Bootstrap values over 50 (1,000 replicates)  
762 were shown at each node. The scale bar indicates the number of nucleotide substitutions per  
763 site. The tree is rooted with the ‘*Ca. L. asiaticus*’ strain psy62.

764

765

766 **Tables**

767

768 **Table 1.** List of Lso strains used in this study

| Sample ID    | Source of isolation           | Geographic origin      | Year of isolation | Lso haplotype <sup>1</sup> |
|--------------|-------------------------------|------------------------|-------------------|----------------------------|
| NZ1          | <i>Bactericera cockerelli</i> | New Zealand            | 2010              |                            |
| RSTM         | <i>Bactericera cockerelli</i> | United States          | 2015              |                            |
| 16/19.4      | <i>Bactericera cockerelli</i> | United States          | NA                | A                          |
| HenneA       | <i>Bactericera cockerelli</i> | USA                    | 2012              |                            |
| 15/44        | <i>Solanum lycopersicum</i>   | New Zealand            | 2010              |                            |
| 16/19.8      | <i>Bactericera cockerelli</i> | United States          | NA                |                            |
| ZC1          | <i>Bactericera cockerelli</i> | United States          | NA                | B                          |
| 16/21.1-2    | <i>Solanum tuberosum</i>      | United States          | NA                |                            |
| FIN111       | <i>Trioza apicalis</i>        | Finland                | 2012              |                            |
| FIN114       | <i>Trioza apicalis</i>        | Finland                | 2012              | C                          |
| 16/231       | <i>Trioza apicalis</i>        | Finland                | NA                |                            |
| 16/239-1c    | <i>Bactericera trigonica</i>  | Eure-et-Loir, France   | 2016              |                            |
| Haplotype D1 | <i>Bactericera trigonica</i>  | Israel                 | 2017              |                            |
| 15/150.2     | <i>Daucus carota</i>          | Canary Islands, Spain  | NA                |                            |
| 13/479.2     | <i>Daucus carota</i>          | Dordogne, France       | 2013              |                            |
| 16/418.1a    | <i>Daucus carota</i>          | Dordogne, France       | 2016              |                            |
| 16/221-10    | <i>Daucus carota</i>          | Eure-et-Loir, France   | 2016              |                            |
| 14/427.2     | <i>Daucus carota</i>          | Gard, France           | 2014              |                            |
| 16/208-2     | <i>Daucus carota</i>          | Gers, France           | 2016              |                            |
| 16/261-21    | <i>Daucus carota</i>          | Haute-garonne, France  | 2016              | D                          |
| 16/283-12    | <i>Daucus carota</i>          | Loiret, France         | 2016              |                            |
| 16/208-1     | <i>Daucus carota</i>          | Lot-et-Garonne, France | 2016              |                            |
| 14/362.61    | <i>Daucus carota</i>          | Maine et Loire, France | 2014              |                            |
| 14/382.20    | <i>Daucus carota</i>          | Maine et Loire, France | 2014              |                            |
| 17/159.1     | <i>Daucus carota</i>          | Morocco                | 2013              |                            |
| 16/261-3     | <i>Daucus carota</i>          | Tarn, France           | 2016              |                            |
| 16/261-11    | <i>Daucus carota</i>          | Tarn, France           | 2016              |                            |
| 15/286       | <i>Petroselinum crispum</i>   | Aude, France           | 2015              |                            |
| 14/367.1     | <i>Anthriscus cerefolium</i>  | Maine et Loire, France | 2014              |                            |
| 14/363.3     | <i>Apium graveolens</i>       | Maine et Loire, France | 2014              |                            |
| 16/239-9e    | <i>Bactericera trigonica</i>  | Loiret, France         | 2016              |                            |
| 16/153.2     | <i>Bactericera trigonica</i>  | Segovia, Spain         | 2014              |                            |
| 15/150.5     | <i>Daucus carota</i>          | Canary Islands, Spain  | NA                |                            |
| 16/240-16    | <i>Daucus carota</i>          | Cher, France           | 2016              |                            |
| 14/244       | <i>Daucus carota</i>          | Eure-et-Loir, France   | 2014              |                            |
| 14/427.3     | <i>Daucus carota</i>          | Gard, France           | 2014              |                            |
| 14/235       | <i>Daucus carota</i>          | Loiret, France         | 2014              |                            |
| 12/379.8     | <i>Daucus carota</i>          | Loir-et-Cher, France   | 2012              | E                          |
| 16/185-1a    | <i>Daucus carota</i>          | Loir-et-Cher, France   | 2016              |                            |
| 14/382.70    | <i>Daucus carota</i>          | Maine et Loire, France | 2014              |                            |
| 16/246-6     | <i>Daucus carota</i>          | Maine et Loire, France | 2016              |                            |
| 16/228-2     | <i>Daucus carota</i>          | Vienne, France         | 2016              |                            |
| 14/366.1     | <i>Foeniculum vulgare</i>     | Maine et Loire, France | 2014              |                            |
| 14/365.4     | <i>Pastinaca sativa</i>       | Maine et Loire, France | 2014              |                            |
| 16/222-1     | <i>Petroselinum crispum</i>   | Eure-et-Loir, France   | 2016              |                            |
| 14/364.2     | <i>Petroselinum crispum</i>   | Maine et Loire, France | 2014              |                            |
| 14/384.2     | <i>Petroselinum crispum</i>   | Maine et Loire, France | 2014              |                            |
| 17/0021-2c   | <i>Daucus carota</i>          | Marne, France          | 2017              |                            |
| 17/0021-2d   | <i>Daucus carota</i>          | Marne, France          | 2017              | G                          |

769 <sup>1</sup>: Lso haplotype was determined during previous study (Hajri et al., 2017) using Nelson et al.  
 770 (2011) or during this study by building the phylogenetic trees including strains LsoA (strains  
 771 NZ1, HenneA and RSTM), LsoB (strain ZC1), LsoC (strains FIN111 and FIN114) and LsoD  
 772 (strain haplotype D1); NA, not available

773 **Table 2.** Primers of housekeeping genes used for amplification and sequencing

774

| Locus        | Primer name | Sequence (5'-3')              | Size of amplicon (bp) |
|--------------|-------------|-------------------------------|-----------------------|
| <i>acnA</i>  | acnA-F      | AATCTTGTGGTTTTGGATGTACAACGTG  | 949                   |
|              | acnA-R      | CTATCAAATTGGAGCGATGTATACGCT   |                       |
| <i>atpD</i>  | atpD-F      | GCGGGAGTTGGGAAAACAGTATTAATCAT | 811                   |
|              | atpD-R      | ATTCAGCAACATGAAACGGCTGTGACAT  |                       |
| <i>glnA</i>  | glnA-F      | ATGGTTGATGACGCTACCTCTATCATC   | 905                   |
|              | glnA-R      | AGGGCTTTCGCATGTTTGATAAATACCTC |                       |
| <i>glyA</i>  | glyA-F      | CGTTCAACCTCATTCTGGATCTCAGATGA | 843                   |
|              | glyA-R      | AATCCTCTCGTTGTACCAGATGGCGTA   |                       |
| <i>gnd</i>   | gnd-F       | CTAATGATGATAACAGACGGGAATCC    | 889                   |
|              | gnd-R       | GTATTATACATCCTGCACGCCAGA      |                       |
| <i>groEL</i> | groEL-F     | CAATCTCGCTGTTCAAGAAGTTGTAGA   | 927                   |
|              | groEL-R     | TTAACAGATAATGCTTGAGCAGCTCG    |                       |
| <i>ftsZ</i>  | ftsZ-F      | ATGGTGGAAAAACACTCTAATGTGGATAT | 915                   |
|              | ftsZ-R      | AGCCTCATCAAATGTAGCACCAAGAAT   |                       |

775

776

777 **Table 3.** Summary statistics for the seven housekeeping genes and concatenated sequences used  
778 in this study

779

| Locus               | sites <sup>a</sup> | GC%  | S <sup>b</sup> | $\theta\pi^c$ | $\theta_w^d$ | Tajima's D <sup>e</sup> | dN/dS <sup>f</sup> |
|---------------------|--------------------|------|----------------|---------------|--------------|-------------------------|--------------------|
| <i>acnA</i>         | 816                | 37.2 | 25             | 0.00640       | 0.00687      | -0.22568                | 0.128              |
| <i>atpD</i>         | 759                | 40.7 | 20             | 0.00578       | 0.00591      | -0.06851                | 0.030              |
| <i>ftsZ</i>         | 774                | 43.2 | 12             | 0.00390       | 0.00348      | 0.35732                 | 0.021              |
| <i>glnA</i>         | 783                | 35.5 | 27             | 0.01123       | 0.00773      | 1.49289                 | 0.311              |
| <i>glyA</i>         | 747                | 41.8 | 19             | 0.00648       | 0.00570      | 0.43441                 | 0.199              |
| <i>gnd</i>          | 744                | 33.9 | 22             | 0.00642       | 0.00693      | -0.24289                | 0.760              |
| <i>groEL</i>        | 792                | 39.9 | 18             | 0.00521       | 0.00510      | 0.06685                 | 0.000              |
| Concat <sup>g</sup> | 5415               | 38.9 | 143            | 0.00649       | 0.00597      | 0.31854                 | 0.161              |

780 <sup>a</sup> number of analyzed sites

781 <sup>b</sup> number of polymorphic sites

782 <sup>c</sup> nucleotide diversity (Nei, 1987)

783 <sup>d</sup> nucleotide diversity with Watterson's estimator (Watterson, 1975)

784 <sup>e</sup> Neutrality test of Tajima (1989); all values are not significant ( $P > 0.10$ )

785 <sup>f</sup> ratio of non-synonymous to synonymous substitutions

786 <sup>g</sup> data set of concatenated sequences of the seven loci

787

788 **Table 4.** New SNP features of the LsoG haplotype

789

| <b>Gene region</b> | <b>Haplotypes</b> |          |          |          |          |          |
|--------------------|-------------------|----------|----------|----------|----------|----------|
|                    | <b>A</b>          | <b>B</b> | <b>C</b> | <b>D</b> | <b>E</b> | <b>G</b> |
| <i>glnA</i> (778)  | G                 | G        | G        | G        | G        | A        |
| <i>glyA</i> (393)  | C                 | C        | C        | C        | C        | G        |
| <i>groEL</i> (726) | G                 | G        | G        | G        | G        | T        |
| <i>ftsZ</i> (708)  | C                 | C        | C        | T        | C        | C        |
| <i>ftsZ</i> (717)  | G                 | G        | G        | A        | G        | G        |

790

791 Nucleotide numbers are indicated relative to the first nucleotide of the aligned sequence of each  
792 gene

793

794
